# Supplementary material
Source: publisher site journal article supplement (https://oneecosystem.pensoft.net/article/download/suppl/7028069/)
Supplement: Supplementary file 1

Estimated scales of nutrient content in soil

|  | Available Phosphorous, mg×kg-1 (Mineev, 2004) | Available Potassium, mg×kg-1 (Mineev, 2004) | Nitrate Nitrogen  (NO3-N), mg×kg-1 (Gamzikov, 1981) | Ammonium-Nitrogen (NH4+-N), mg×kg-1 (Gamzikov, 1981) |
| --- | --- | --- | --- | --- |
| Very high | >250 | >250 | - | - |
| High | 250-150 | 250-170 | >20 | >40 |
| Increased | 150-100 | 170-120 | - | - |
| Moderate | 100-50 | 120-80 | 20-15 | 40-20 |
| Low | 50-25 | 80-40 | 15-10 | 20-10 |
| Very low | <25 | <7 | <10 | <10 |
